# Supplementary material
Source: Springer Nature journal article supplement (https://www.springermedizin.de/resource/supplementary/12879_2010_1372_MOESM2_ESM.pdf/9443004)
Supplement: MOESM2 [file 9443004]

**Ever started ART until 31 May 2005: 3846**

Outcome other than LTFU  
(Alive, dead, stopped, transfer-out): 2006

**LTFU: 1840 (48%)**

No consent to tracing: 40

**Consent to tracing: 1800 (98%)**

Outside Lilongwe city without phone  
or within and no phone or address: 1076

**Number of eligible patients: 724 (40%)**  
(659 adults; 65 children, age < 15)

**Identified in other  
health facilities: 93 (13%)**

**Targeted by outreach:  
631 (87%)**
